# Supplementary material for: Restitution of gene expression and histone acetylation signatures altered by hepatitis B virus through antiviral microRNA-like molecules in nontransformed murine hepatocytes
Source: PubMed Central journal article supplement (PMC4391130; doi:10.1186/1868-7083-6-26), 2014-11-14
Supplement: 13148_2014_90_MOESM1_ESM.pdf [file 13148_2014_90_MOESM1_ESM.pdf]

**Additional file 1 - ‘Restitution of gene expression and histone acetylation signatures altered by hepatitis B virus through anti-viral miR-like molecules in non-transformed murine hepatocytes’**

Andreas CW Jenke\*<sup>1</sup>, Kai O Hensel\*<sup>1</sup>, Andreas Klein<sup>1</sup>, Lisa Willuhn<sup>1</sup>, Susanna Prax<sup>1</sup>, Patrick P Weil<sup>1</sup>, Theodor Winkler<sup>1</sup>, Timo Deba<sup>1</sup>, Valerie Orth<sup>1</sup>, Armin Baiker<sup>2</sup>, Stefan Wirth<sup>1</sup>, Jan Postberg†<sup>1</sup>

<sup>1</sup>Department of Paediatrics, HELIOS Medical Centre Wuppertal, Centre for Clinical and Translational Research (CCTR), Witten/Herdecke University, Faculty of Health, Centre for Biomedical Education and Research (ZBAF), Wuppertal, Germany

<sup>2</sup>Bavarian Health and Food Safety Authority, Veterinaerstrasse 2, D-85764 Oberschleißheim, Germany

**Figure S1**

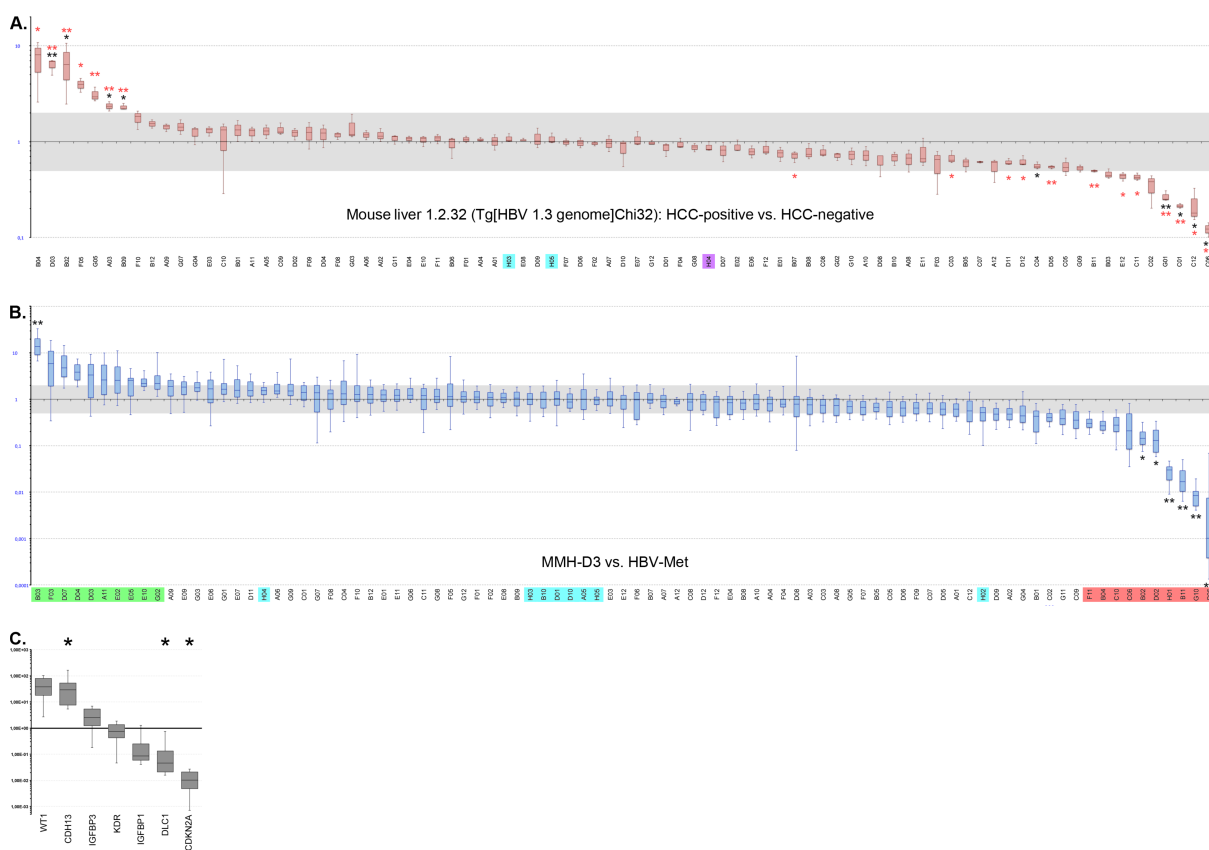

**Comparison of differential mRNA accumulation between murine HBV-positive mice liver samples with or without HCC, mouse cell lines and humans.**

**A.** Relative enrichment of mRNA in 1.2.32 (Tg[HBV 1.3 genome]Chi32) mice (HCC positive [n=5] versus HCC-negative [n=5]). *HSP90AB1*, *ACTB* and *GAPDH* were used for normalization (Cyan and purple shaded). \*\*:  $p \leq 0.01$ ; \*:  $0.01 \leq p \leq 0.05$ . Black asterisks: *HSP90AB1*, *ACTB* and *GAPDH* were used for normalization. Red asterisks: *HSP90AB1* and *ACTB* were used for normalization (Boxplots not shown). **B.** Relative enrichment of mRNA in MMH-D3 versus HBV-Met. H02 to H05 were used for normalization. **C.** Abundance of selected mRNAs in human liver from juvenile patients with chronic hepatitis B (non-HCC; n=3) versus HBV-negative specimens (n=3). Statistics and coloring correspond to Figure 1.

**Figure S2**

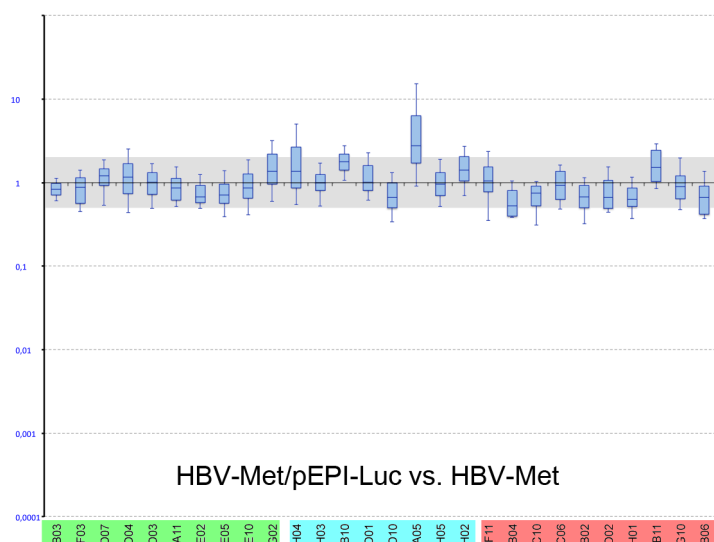

**Gene expression analyses in HBV-Met transfected with the shRNA-cassette deficient pEPI-luciferase vector versus untreated HBV-Met.** Statistics and coloring correspond to Figure 1.

**Figure S3**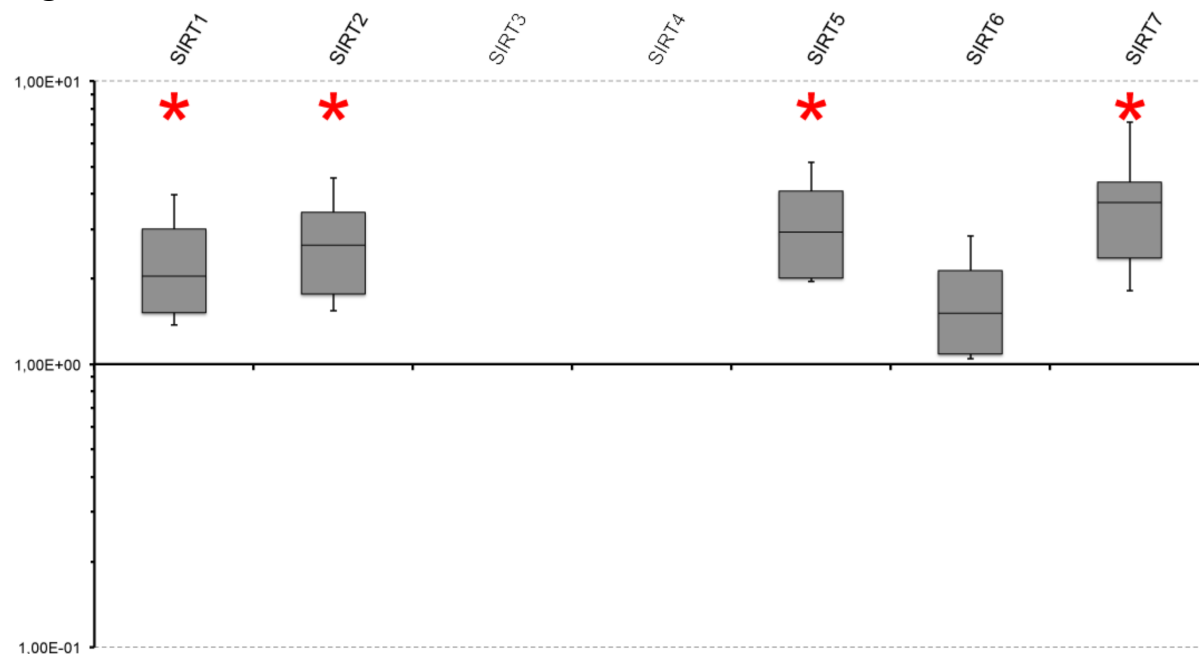

**Accumulation of SIRT1 -7mRNAs in HBV-Met cells compared with MMH-D3 cells.** The mRNAs of *SIRT1*, *SIRT2*, *SIRT4* and *SIRT7* were slightly but significantly (\*:  $0.01 \leq p \leq 0.05$ ) elevated in HBV-Met cells when compared with MMH-D3 cells, whereas *SIRT3* and *SIRT4* could not be detected in both cell lines. Statistics correspond to Figure 1.

**Figure S4**

| Position | Unigene   | Refseq    | Symbol | Description                                  |
|----------|-----------|-----------|--------|----------------------------------------------|
| A01      | Mm.27681  | NM_009615 | Adam17 | A disintegrin and metallopeptidase domain 17 |
| A02      | Mm.6645   | NM_009652 | Akt1   | Thymoma viral proto-oncogene 1               |
| A03      | Mm.439874 | NM_007426 | Angpt2 | Angiopoietin 2                               |
| A04      | Mm.19904  | NM_007527 | Bax    | Bcl2-associated X protein                    |
| A05      | Mm.257460 | NM_009741 | Bcl2   | B-cell leukemia/lymphoma 2                   |
| A06      | Mm.238213 | NM_009743 | Bcl2l1 | Bcl2-like 1                                  |
| A07      | Mm.235081 | NM_007544 | Bid    | BH3 interacting domain death agonist         |
| A08      | Mm.335659 | NM_007465 | Birc2  | Baculoviral IAP repeat-containing 2          |
| A09      | Mm.8552   | NM_009689 | Birc5  | Baculoviral IAP repeat-containing 5          |
| A10      | Mm.336851 | NM_009812 | Casp8  | Caspase 8                                    |
| A11      | Mm.284248 | NM_013653 | Ccl5   | Chemokine (C-C motif) ligand 5               |
| A12      | Mm.273049 | NM_007631 | Ccnd1  | Cyclin D1                                    |
| B01      | Mm.333406 | NM_009829 | Ccnd2  | Cyclin D2                                    |
| B02      | Mm.35605  | NM_009864 | Cdh1   | Cadherin 1                                   |
| B03      | Mm.334841 | NM_019707 | Cdh13  | Cadherin 13                                  |
| B04      | Mm.195663 | NM_007669 | Cdkn1a | Cyclin-dependent kinase inhibitor 1A (P21)   |
| B05      | Mm.2958   | NM_009875 | Cdkn1b | Cyclin-dependent kinase inhibitor 1B         |

|     |           |              |         |                                                                            |
|-----|-----------|--------------|---------|----------------------------------------------------------------------------|
| B06 | Mm.4733   | NM_009877    | Cdkn2a  | Cyclin-dependent kinase inhibitor 2A                                       |
| B07 | Mm.336848 | NM_009805    | Cflar   | CASP8 and FADD-like apoptosis regulator                                    |
| B08 | Mm.291928 | NM_007614    | Ctnnb1  | Catenin (cadherin associated protein), beta 1                              |
| B09 | Mm.1401   | NM_009911    | Cxcr4   | Chemokine (C-X-C motif) receptor 4                                         |
| B10 | Mm.29629  | NM_001001602 | Dab2ip  | Disabled homolog 2 (Drosophila) interacting protein                        |
| B11 | Mm.210875 | NM_015802    | Dlc1    | Deleted in liver cancer 1                                                  |
| B12 | Mm.18036  | NM_007891    | E2f1    | E2F transcription factor 1                                                 |
| C01 | Mm.252481 | NM_010113    | Egf     | Epidermal growth factor                                                    |
| C02 | Mm.8534   | NM_007912    | Egfr    | Epidermal growth factor receptor                                           |
| C03 | Mm.258397 | NM_177821    | Ep300   | E1A binding protein p300                                                   |
| C04 | Mm.5126   | NM_010175    | Fadd    | Fas (TNFRSF6)-associated via death domain                                  |
| C05 | Mm.1626   | NM_007987    | Fas     | Fas (TNF receptor superfamily member 6)                                    |
| C06 | Mm.397619 | NM_010210    | Fhit    | Fragile histidine triad gene                                               |
| C07 | Mm.389712 | NM_010228    | Flt1    | FMS-like tyrosine kinase 1                                                 |
| C08 | Mm.297906 | NM_008057    | Fzd7    | Frizzled homolog 7 (Drosophila)                                            |
| C09 | Mm.1360   | NM_008655    | Gadd45b | Growth arrest and DNA-damage-inducible 45 beta                             |
| C10 | Mm.299292 | NM_013541    | Gstp1   | Glutathione S-transferase, pi 1                                            |
| C11 | Mm.267078 | NM_010427    | Hgf     | Hepatocyte growth factor                                                   |
| C12 | Mm.254493 | NM_020259    | Hhip    | Hedgehog-interacting protein                                               |
| D01 | Mm.334313 | NM_008284    | Hras1   | Harvey rat sarcoma virus oncogene 1                                        |
| D02 | Mm.3862   | NM_010514    | Igf2    | Insulin-like growth factor 2                                               |
| D03 | Mm.21300  | NM_008341    | Igfbp1  | Insulin-like growth factor binding protein 1                               |
| D04 | Mm.29254  | NM_008343    | Igfbp3  | Insulin-like growth factor binding protein 3                               |
| D05 | Mm.4952   | NM_010570    | Irs1    | Insulin receptor substrate 1                                               |
| D06 | Mm.263396 | NM_010578    | Itgb1   | Integrin beta 1 (fibronectin receptor beta)                                |
| D07 | Mm.285    | NM_010612    | Kdr     | Kinase insert domain protein receptor                                      |
| D08 | Mm.255219 | NM_010703    | Lef1    | Lymphoid enhancer binding factor 1                                         |
| D09 | Mm.1639   | NM_008562    | Mcl1    | Myeloid cell leukemia sequence 1                                           |
| D10 | Mm.86844  | NM_008591    | Met     | Met proto-oncogene                                                         |
| D11 | Mm.4619   | NM_008628    | Msh2    | MutS homolog 2 (E. coli)                                                   |
| D12 | Mm.343101 | NM_010829    | Msh3    | MutS homolog 3 (E. coli)                                                   |
| E01 | Mm.130883 | NM_026002    | Mtdh    | Metadherin                                                                 |
| E02 | Mm.2444   | NM_010849    | Myc     | Myelocytomatosis oncogene                                                  |
| E03 | Mm.256765 | NM_008689    | Nfkb1   | Nuclear factor of kappa light polypeptide gene enhancer in B-cells 1, p105 |
| E04 | Mm.400954 | NM_010937    | Nras    | Neuroblastoma ras oncogene                                                 |
| E05 | Mm.379474 | NM_177906    | Opcml   | Opioid binding protein/cell adhesion molecule-like                         |
| E06 | Mm.221403 | NM_011058    | Pdgfra  | Platelet derived growth factor receptor, alpha polypeptide                 |
| E07 | Mm.7906   | NM_023371    | Pin1    | Protein (peptidyl-prolyl cis/trans isomerase) NIMA-interacting 1           |
| E08 | Mm.245395 | NM_008960    | Pten    | Phosphatase and tensin homolog                                             |
| E09 | Mm.292547 | NM_011198    | Ptgs2   | Prostaglandin-endoperoxide synthase 2                                      |
| E10 | Mm.254494 | NM_007982    | Ptk2    | PTK2 protein tyrosine kinase 2                                             |
| E11 | Mm.24163  | NM_023258    | Pycard  | PYD and CARD domain containing                                             |
| E12 | Mm.292510 | NM_009007    | Rac1    | RAS-related C3 botulinum substrate 1                                       |
| F01 | Mm.12091  | NM_019713    | Rassf1  | Ras association (RalGDS/AF-6) domain family member 1                       |
| F02 | Mm.273862 | NM_009029    | Rb1     | Retinoblastoma 1                                                           |
| F03 | Mm.425236 | NM_011261    | Reln    | Reelin                                                                     |
| F04 | Mm.757    | NM_016802    | Rhoa    | Ras homolog gene family, member A                                          |

|     |           |              |           |                                                           |
|-----|-----------|--------------|-----------|-----------------------------------------------------------|
| F05 | Mm.378894 | NM_019732    | Runx3     | Runt related transcription factor 3                       |
| F06 | Mm.19155  | NM_009144    | Sfrp2     | Secreted frizzled-related protein 2                       |
| F07 | Mm.100399 | NM_008540    | Smad4     | MAD homolog 4 (Drosophila)                                |
| F08 | Mm.34407  | NM_001042660 | Smad7     | MAD homolog 7 (Drosophila)                                |
| F09 | Mm.130    | NM_009896    | Socs1     | Suppressor of cytokine signaling 1                        |
| F10 | Mm.3468   | NM_007707    | Socs3     | Suppressor of cytokine signaling 3                        |
| F11 | Mm.249934 | NM_011486    | Stat3     | Signal transducer and activator of transcription 3        |
| F12 | Mm.4269   | NM_013685    | Tcf4      | Transcription factor 4                                    |
| G01 | Mm.10109  | NM_009354    | Tert      | Telomerase reverse transcriptase                          |
| G02 | Mm.137222 | NM_031199    | Tgfa      | Transforming growth factor alpha                          |
| G03 | Mm.248380 | NM_011577    | Tgfb1     | Transforming growth factor, beta 1                        |
| G04 | Mm.172346 | NM_009371    | Tgfb2     | Transforming growth factor, beta receptor II              |
| G05 | Mm.38049  | NM_021297    | Tlr4      | Toll-like receptor 4                                      |
| G06 | Mm.193430 | NM_020275    | Tnfrsf10b | Tumor necrosis factor receptor superfamily, member 10b    |
| G07 | Mm.1062   | NM_009425    | Tnfsf10   | Tumor necrosis factor (ligand) superfamily, member 10     |
| G08 | Mm.222    | NM_011640    | Trp53     | Transformation related protein 53                         |
| G09 | Mm.282184 | NM_009505    | Vegfa     | Vascular endothelial growth factor A                      |
| G10 | Mm.389339 | NM_144783    | Wt1       | Wilms tumor 1 homolog                                     |
| G11 | Mm.259879 | NM_009688    | Xiap      | X-linked inhibitor of apoptosis                           |
| G12 | Mm.221992 | NM_009534    | Yap1      | Yes-associated protein 1                                  |
| H01 | Mm.3317   | NM_010368    | Gusb      | Glucuronidase, beta                                       |
| H02 | Mm.299381 | NM_013556    | Hprt      | Hypoxanthine guanine phosphoribosyl transferase           |
| H03 | Mm.2180   | NM_008302    | Hsp90ab1  | Heat shock protein 90 alpha (cytosolic), class B member 1 |
| H04 | Mm.343110 | NM_008084    | Gapdh     | Glyceraldehyde-3-phosphate dehydrogenase                  |
| H05 | Mm.328431 | NM_007393    | Actb      | Actin, beta                                               |

**Genes in focus and numbering (column 1) assigned to Figures 1-3 and Additional file 1:**

**Figures S1-S2.**
